RESEARCH ARTICLE

# Screening of the Pan-African Natural Product Library Identifies Ixoratannin A-2 and Boldine as Novel HIV-1 Inhibitors

Ian Tietjen<sup>1,2\*</sup>, Fidele Ntie-Kang<sup>3</sup>, Philip Mwimanzi<sup>2</sup>, Pascal Amoa Onguéné<sup>4</sup>, Margaret A. Scull<sup>5</sup>, Thomas Oyebo Idowu<sup>6</sup>, Abiodun Oguntuga Ogundaini<sup>6</sup>, Luc Mbaze Meva'a<sup>4</sup>, Berhanu M. Abegaz<sup>7</sup>, Charles M. Rice<sup>5</sup>, Kerstin Andrae-Marobela<sup>8</sup>, Mark A. Brockman<sup>2,9,10</sup>, Zabrina L. Brumme<sup>2,10</sup>, David Fedida<sup>1</sup>

**1** Department of Anesthesiology, Pharmacology, and Therapeutics, University of British Columbia, Vancouver, BC, Canada, **2** Faculty of Health Sciences, Simon Fraser University, Burnaby, BC, Canada, **3** Department of Chemistry, Chemical and Bioactivity Information Centre, Faculty of Science, University of Buea, Buea, Cameroon, **4** Department of Chemistry, Faculty of Science, University of Douala, Douala, Cameroon, **5** Laboratory of Virology and Infectious Disease, The Rockefeller University, New York, NY, United States of America, **6** Department of Pharmaceutical Chemistry, Faculty of Pharmacy, Obafemi Awolowo University, Ile-Ife, Nigeria, **7** African Academy of Sciences, Nairobi, Kenya, **8** Department of Biological Sciences, University of Botswana, Gaborone, Botswana, **9** Department of Molecular Biology and Biochemistry, Faculty of Science, Simon Fraser University, Burnaby, BC, Canada, **10** British Columbia Centre for Excellence in HIV/AIDS, Vancouver, BC, Canada

\* [itietjen@mail.ubc.ca](mailto:itietjen@mail.ubc.ca) (IT)

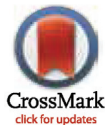

**OPEN ACCESS**

**Citation:** Tietjen I, Ntie-Kang F, Mwimanzi P, Onguéné PA, Scull MA, Idowu TO, et al. (2015) Screening of the Pan-African Natural Product Library Identifies Ixoratannin A-2 and Boldine as Novel HIV-1 Inhibitors. PLoS ONE 10(4): e0121099. doi:10.1371/journal.pone.0121099

**Academic Editor:** Michael Schindler, Helmholtz Zentrum Muenchen—German Research Center for Environmental Health, GERMANY

**Received:** October 24, 2014

**Accepted:** February 9, 2015

**Published:** April 1, 2015

**Copyright:** © 2015 Tietjen et al. This is an open access article distributed under the terms of the [Creative Commons Attribution License](http://creativecommons.org/licenses/by/4.0/), which permits unrestricted use, distribution, and reproduction in any medium, provided the original author and source are credited.

**Data Availability Statement:** All relevant data are within the paper.

**Funding:** Funding was provided by Canadian Institutes for Health Research (HOP-115700) to ZLB and MAB, <http://www.cihr-irsc.gc.ca/e/193.html>; Grand Challenges Canada (no grant number) to IT, <http://www.grandchallenges.ca/grantee-stars/0487-01-10/>; Canada-Sub Saharan Africa (CANSSA) HIV/AIDS Network through funding provided by the Global Health Research Initiative (GHRI), itself a collaborative research funding partnership of the

## Abstract

The continued burden of HIV in resource-limited regions such as parts of sub-Saharan Africa, combined with adverse effects and potential risks of resistance to existing antiretroviral therapies, emphasize the need to identify new HIV inhibitors. Here we performed a virtual screen of molecules from the pan-African Natural Product Library, the largest collection of medicinal plant-derived pure compounds on the African continent. We identified eight molecules with structural similarity to reported interactors of Vpu, an HIV-1 accessory protein with reported ion channel activity. Using *in vitro* HIV-1 replication assays with a CD4+ T cell line and peripheral blood mononuclear cells, we confirmed antiviral activity and minimal cytotoxicity for two compounds, ixoratannin A-2 and boldine. Notably, ixoratannin A-2 retained inhibitory activity against recombinant HIV-1 strains encoding patient-derived mutations that confer resistance to protease, non-nucleoside reverse transcriptase, or integrase inhibitors. Moreover, ixoratannin A-2 was less effective at inhibiting replication of HIV-1 lacking Vpu, supporting this protein as a possible direct or indirect target. In contrast, boldine was less effective against a protease inhibitor-resistant HIV-1 strain. Both ixoratannin A-2 and boldine also inhibited *in vitro* replication of hepatitis C virus (HCV). However, BIT-225, a previously-reported Vpu inhibitor, demonstrated antiviral activity but also cytotoxicity in HIV-1 and HCV replication assays. Our work identifies pure compounds derived from African plants with potential novel activities against viruses that disproportionately afflict resource-limited regions of the world.

Canadian Institutes of Health Research (CIHR), the Canadian International Development Agency (CIDA), and the International Development Research Centre (IDRC) (no grant number) to MAB and ZLB, <http://www.canssa.org/>; Canadian Institutes of Health Research postdoctoral fellowship (no grant number) to PM, <http://www.cihr-irsc.gc.ca/e/193.html>; Michael Smith Foundation for Health Research Postdoctoral fellowship (no grant number) to PM, <http://www.msfr.org/role-hiv-nef-establishment-and-maintenance-hiv-latency>; National Research Service Award from the National Institute of Allergy and Infectious Diseases (F32 AI091207) to MAS, <http://www.niaid.nih.gov/Pages/default.aspx>; National Institutes of Health R01 AI099284, R01 AI075099 to CMR, <http://www.niaid.nih.gov/Pages/default.aspx>; Canadian Institutes of Health New Investigator Award (no grant number) to ZLB, <http://www.cihr-irsc.gc.ca/e/193.html>; Michael Smith Foundation for Health Research Scholar Award (no grant number) to ZLB, <http://www.msfr.org/zabrina-brumme>; Canada Research Chair in Viral Pathogenesis and Immunity (no grant number) to MAB, <http://www.chairs-chaires.gc.ca/chairholders-titulaires/profile-eng.aspx?profileId=2825>. The funders had no role in study design, data collection and analysis, decision to publish, or preparation of the manuscript.

**Competing Interests:** The authors have declared that no competing interests exist.

## Introduction

While recent advances in antiretroviral therapies (ARVs) have converted HIV to a chronic, manageable condition in many high-income settings, barriers remain for their successful use in low and middle-income countries with high disease burden; for example in parts of sub-Saharan Africa. Here, despite recent significant progress to improve ARV access globally [1], the challenges are complex and can include the fragility and uncertainty of ARV supply systems, limited health care infrastructure, and the ability to retain patients in care [2, 3]. Moreover, the side-effects of ARVs can result in poor adherence and increased risk of viral resistance [3, 4]. Drug resistance has been documented to all licensed ARVs [5], and transmission of resistant HIV remains a major concern in many sub-Saharan African nations [6]. Thus new HIV therapies that target additional viral proteins and are derived from local sources may be particularly advantageous in these regions.

Natural products are a promising but undervalued resource for identifying new antivirals [2]. Compounds derived from these sources can encompass structural diversity that falls outside the scope of chemical spaces found in many synthetic chemical screening libraries [1, 7]; as such, they have the potential to act via mechanisms distinct from those of conventional therapies. With this advantage in mind, the pan-African Natural Product Library (p-ANAPL) was formed to provide a centralized resource of pure compounds obtained from local plants with medicinal properties supported by indigenous knowledge [8]. To date, the p-ANAPL contains over 500 pure compounds and represents the largest physical collection of natural products from medicinal plants in Africa [9]. The p-ANAPL thus represents an opportunity to screen for new inhibitors of pathogens that disproportionately affect countries on the African continent.

Currently, no licensed ARVs target the accessory proteins of HIV-1. Vpu is an 81–82 amino acid transmembrane protein that is found in HIV-1 and a subset of SIVs and enhances viral replication through multiple functions [10, 11]. Specifically, Vpu augments virion release by downregulating CD4 and the host restriction factor BST2/CD317/tetherin, which otherwise captures mature virions at the cell surface. While HIV-1 with defective Vpu can replicate *in vitro* in some cell lines, these viruses generally display reduced spread, defects in viral budding, and accumulation at the surface of infected cells. Consistent with these phenotypes, a Vpu-deficient chimeric SIV/HIV strain replicated poorly and did not cause depletion of CD4+ lymphocytes in macaques [12]. Thus, effective replication of HIV *in vivo* requires a functional Vpu protein, which makes it a promising drug target. Vpu is also reported by some to have ion channel activity [13–15], although this is controversial [16] and the role of this activity in HIV-1 replication remains uncertain [11]. Nevertheless, a few compounds with an acylguanidine moiety including hexamethylene amiloride and BIT-225 (Fig. 1A) are reported to inhibit both Vpu ion channel activity in lipid bilayers and viral replication *in vitro* [11, 17]. However, the cellular toxicity often associated with this class of compounds is an obstacle toward their further development as antivirals [18, 19].

Here we performed a virtual screen of the p-ANAPL to identify molecules with structural similarity to BIT-225 and other reported Vpu ion channel interactors, with the goal of identifying novel inhibitors of HIV-1. Of eight compounds identified in this virtual screen, both ixorantannin A-2 and boldine displayed antiviral activity in cell-based HIV-1 and hepatitis C virus (HCV) replication assays. We further investigated the mechanisms of action of these antiviral compounds using recombinant HIV-1 strains that either lacked Vpu or encoded patient-derived sequences resistant to established ARVs.

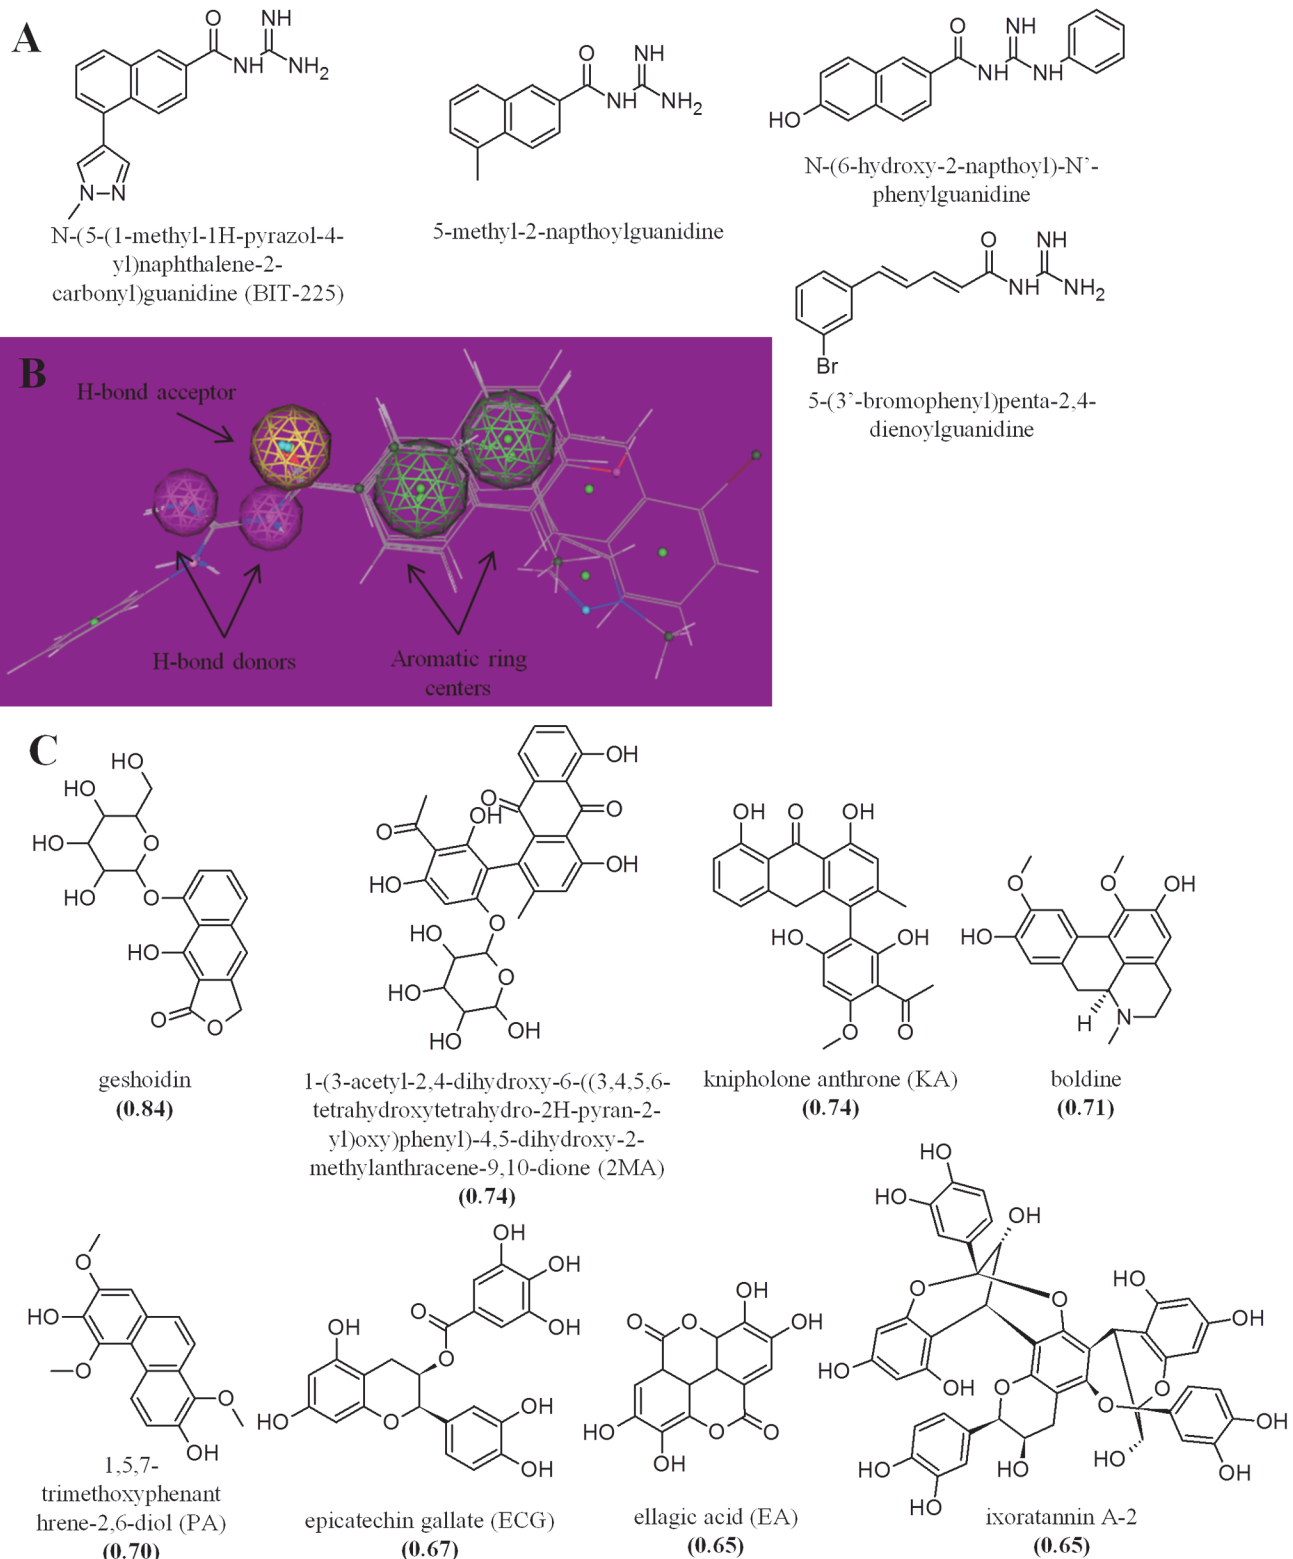

**Fig 1. Putative HIV-1 Vpu inhibitors identified from virtual screening of the p-ANAPL.** **A**, Structures of four molecules predicted to interact with the Vpu ion channel [20]. **B**, Alignment of four molecules. Chemical substituents that define a shared pharmacophore are highlighted. **C**, Eight p-ANAPL molecules containing aspects of the shared pharmacophore. For each compound, root mean square deviation (RMSD) values are shown in parentheses.

doi:10.1371/journal.pone.0121099.g001

## Materials and Methods

### Chemicals, cells, and reagents

Boldine, ECG, EA, and rimantadine hydrochloride were purchased from Sigma. Geshoidin, 2MA, KA, PA, and ixoratannin A-2 were obtained as previously described [21–25]. CEM-GXR and Huh-7.5 cells were cultured and infected as described previously [26, 27].

BIT-225 was synthesized as previously reported [28].  $^1\text{H}$  and  $^{13}\text{C}$  NMR spectra were recorded on a Bruker Ascend spectrometer at 400 and 100 MHz, respectively. Proton NMR data were reported as multiplicities: s for singlet, d for doublet, dd for double of doublets, t for triplet, q for quartet, br s for broad singlet, and m for multiplet. Chemical shifts were reported in parts per million (ppm) and coupling constants in hertz (Hz). For  $^1\text{H}$  NMR spectra,  $\text{CDCl}_3$ , or  $\text{DMSO-d}_6$  was used as solvent and served as the internal standard at  $\delta$  7.26, or 2.54, respectively. For  $^{13}\text{C}$  NMR spectra, multiplicities were established by DEPT experiments and  $\text{CDCl}_3$  or  $\text{DMSO-d}_6$  was used as solvent, which served as the internal standard at  $\delta$  77.16 ( $\text{CDCl}_3$ ), or 39.52 ( $\text{DMSO-d}_6$ ). The purity of each analogue was confirmed by HPLC analysis and using a Finnigan Surveyor HPLC system (Thermo Scientific) consisting of a solvent degasser, a quaternary pump and a Surveyor Auto-sampler Plus module. Chromatographic separation was achieved using gradient elution system consisting of 10–60% acetonitrile in distilled water containing either 5mM ammonium acetate or 0.1% acetic acid. Solvent was pumped through a C18 analytical column (HALO C18 2.7  $\mu\text{M}$ , 4.6 X 50 mm) and delivered at 1.2–2.0 ml/min over 5 min. The column was maintained at room temperature using a column oven. All compounds were dissolved in methanol and detected using a variable wavelength UV detector at 254 nm. The purity was calculated from an integral of peaks and described in terms of percentage (%). Low-resolution mass spectra were obtained using Waters ZQ instrument equipped with ESCi ion source with in-like Waters 2695 HPLC system controlled by MassLynx 4.1 software.  $^1\text{H}$  NMR (400 MHz,  $\text{CDCl}_3$ ):  $\delta$  1.91 (s, 2H), 3.90 (s, 3H), 7.76 (dd,  $J = 1.6$  Hz,  $J = 8.5$  Hz, 1H), 7.83 (d,  $J = 8.5$  Hz, 1H), 7.96 (d,  $J = 8.5$  Hz, 1H), 8.0 (s, 1H), 8.1 (s, 1H), 8.15 (dd,  $J = 1.6$  Hz,  $J = 8.5$  Hz, 1H), 8.2 (s, 1H), 8.59 (s, 1H).  $^{13}\text{C}$  NMR (100 MHz,  $\text{DMSO-d}_6$ ): 21.5, 122.2, 122.4, 124.9, 126.6, 127.1, 128.8, 128.9, 130.0, 131.2, 131.7, 135.2, 136.1, 136.8, 163.2, 172.5, 175.9. MS (ESI)  $m/z$ :  $[\text{M} + \text{H}]^+$  Calculated for  $\text{C}_{16}\text{H}_{15}\text{N}_5\text{O}$ : 294.13; Found: 294.4. Purity: >99%.

The following reagents were obtained through the NIH AIDS Reagent Program, Division of AIDS, NIAID, NIH: pNLA-3 from Dr. Malcom Martin (Catalog #114) and p210-13 (HIV-1 $_{\Delta\text{Vpu}}$ ) from Dr. Ronald Desrosiers: (Catalog #2484) [29].

### Virtual screening

The chemical structures of four known Vpu blockers were retrieved from the literature [20]. The 3D conformations were generated using the (default) MMFF94x forcefield [30], using the MOE software tool [31], following the protocol previously implemented by Daveu et al. [32]. The force field parameters were kept at their default values of the Strain Limit of 4 kcal/mol and the Conformations limit of 250 conformations/molecule. The other settings were kept at their default values, with the exception of the Split Output option being turned off, and the Input Filters being turned off. A pharmacophore query is created using the Pharmacophore Query Editor, implemented in MOE. A query consists of a set of constraints on the location and type of pharmacophoric features, which can be used to search a database of molecular conformations. In this work, the query was created and saved, in order to be used later in a pharmacophore search. While a query may be created without a reference molecule (e.g., the most active molecule in our database), in this study, the common pharmacophore features of all four compounds was used in the virtual screening of the p-ANAPL library (exported in .mdb format

in MOE) [9]. The Pharmacophore Search was carried out on the p-ANAPL library [9], using the pharmacophore module of the MOE package. Compounds with four out of the five common query features were selected as 'hits' in this search. The enrichment was measured against a database that has already been enriched by a factor of 10 using MACCS fingerprints. The Pharmacophore Consensus provided suggested features given an aligned set of molecules. In this study, features that may contribute to the pharmacophore alignment of the four Vpu blockers were located. How well the pharmacophore features of the hits fitted into the common pharmacophore of Vpu actives was expressed as a root mean square deviation (RMSD), with the compounds with lowest RMSD selected as hits.

## Generation of viruses

HIV-1 $_{\Delta\text{vpu}}$  was constructed by digesting plasmid p210-13 3'  $\Delta\text{-vpu}$  [29] with *EcoRI* and *NheI* enzymes. The resulting DNA fragment was then ligated into wild-type pNL4-3 plasmid digested with the same enzymes. HIV-1 $_{\Delta\text{vpu}}$  and HIV-1 $_{\text{NL4-3}}$  viral stocks were prepared by transfection of HEK-293T cells, as previously described [33]. Patient plasma-HIV-1 RNA sequences were analyzed for resistance mutations using the HIV Drug Resistance Database Genotype Resistance Interpretation Algorithm (hivdb.stanford.edu) [5]. Recombinant HIV-1 $_{\text{NL4-3}}$  expressing patient-derived HIV-1 sequences harboring resistance mutations to protease and reverse transcriptase inhibitors (HIV-1 $_{\text{PR+RT}}$ ), reverse transcriptase inhibitors (HIV-1 $_{\text{RT}}$ ), and integrase inhibitors (HIV-1 $_{\text{INT}}$ ) were generated by homologous recombination following co-transfection as reported [34].

The intergenotypic chimeric HCV used in this study—Bi-Gluc-J4(1b)/JFH1(2a) containing cell culture adaptive mutations in NS2 (T2996C) and NS3 (A4827T)—was previously described [35] and subsequently modified to express Gaussia luciferase in the first cistron. HCV stocks used for infection were generated by electroporation of in vitro transcribed RNA into Huh-7.5.1 cells and pooling of supernatants harvested between 60–96 hr post-electroporation. HCV infectivity was determined by limiting dilution assay as previously described [27].

## HIV-1 replication assays in CEM-GXR cells

CEM-GXR cells are an immortalized CD4+ T-lymphocyte line engineered that naturally express the HIV-1 coreceptor CXCR4 and have been further engineered to express the HIV-1 coreceptor CCR5 and a Tat-driven LTR-GFP expression cassette. As such, intracellular GFP expression indicates HIV-1 infection [26]. Cultures of  $10^5$  CEM-GXR cells were seeded into 96-well plates with RPMI-1640 media (Sigma) supplemented with penicillin/streptomycin plus 20% fetal calf serum (R20+), infected with HIV-1 at a multiplicity of infection of 0.03 (to achieve 3% infected cells on Day 2), and incubated at 37°C and 5% CO<sub>2</sub>. 24 hours later, cells were pelleted at 750 g and resuspended in R20+ containing compound or 0.1% DMSO. Stock concentrations of all compounds were prepared in DMSO such that the final concentrations of compounds in culture medium did not exceed 0.1% DMSO. Cells were then incubated at 37°C and 5% CO<sub>2</sub> for an additional 72 h. 5,000 cells from each culture were measured for cell toxicity and GFP expression by flow cytometry. Flow cytometry data were analyzed using FlowJo v. 8.8.7 software (FlowJo LLC, Ashland, OR). Cell toxicity in HIV-1 infected cell cultures with compound was calculated as the relative percentage of CEM-GXR cells that displayed characteristic forward- and side-scatter parameters compared to control infected cultures plus 0.1% DMSO. Background GFP expression in uninfected cultures was set at 0.05% GFP-positive cells. For each experiment, all data points were obtained in triplicate. All data are reported as the mean  $\pm$  s.e.m. from at least 3 independent experiments performed with different virus stocks and/or performed on different days. However, all experiments that compare HIV-1 $_{\text{NL4-3}}$

and mutant HIV-1 were performed in parallel.  $EC_{50}$  and  $CC_{50}$  values for each compound were calculated from at least four concentrations. Statistical analyses were performed using Student's unpaired t test, with a p value < 0.05 plus a Bonferroni correction to adjust for multiple comparisons considered significant.

### HIV-1 replication assays in peripheral blood mononuclear cells (PBMCs)

PBMCs from HIV-1 negative subjects, purchased commercially (StemCell Technologies, Vancouver, Canada), were maintained in RPMI-1640 media (Sigma) supplemented with penicillin/streptomycin plus 10% fetal calf serum (R10+). 72 h prior to viral infection, PBMCs were stimulated by addition of 5  $\mu$ g/mL phytohaemagglutinin (PHA) (Day 0) and maintained in R10+ medium supplemented with 100 units/mL human IL-2. At Day 3 following cellular activation,  $3 \times 10^5$  cells were infected with HIV-1<sub>NL4-3</sub> at a multiplicity of infection of 0.003 (0.3% infected cells) and incubated at 37°C for 6h, followed by wash and re-suspension in fresh R10+ medium supplemented with 100 units/mL human IL-2 and with or without compounds at defined concentrations. Culture supernatants were collected and replaced with fresh medium supplemented with human IL-2 every 3 days (*i.e.*, Days 6, 9, and 12) with or without fresh compounds. Viral replication at day 12 was monitored by measuring cell culture supernatant levels of p24<sup>Gag</sup> by ELISA (XpressBio, Frederick, MD) following manufacturer's instructions.

Cytotoxicity was determined by ViaCount Assay (Millipore). Briefly, Day 3 PHA-activated PBMCs ( $3 \times 10^5$ ) were cultured in R10+ supplemented with 100 units/mL human IL-2 in the presence of 0.1% DMSO or compounds at defined concentrations. At Day 5, 15  $\mu$ L of each PBMC culture was mixed with Guava ViaCount Reagent at a 1:10 dilution. Data were collected using a Guava EasyCyte HT Flow Cytometer (Millipore).

### HCV cell culture, viral replication assays

HCV cell culture was performed as described previously [27]. Briefly,  $4 \times 10^4$  Huh-7.5 cells were seeded into 24-well plates and incubated at 37°C and 5% CO<sub>2</sub> overnight. Cells were then infected with HCV (multiplicity of infection = 0.3) for 6 hours, followed by removal of HCV and incubation with fresh medium containing compounds at stated concentrations. Cultures were then incubated for 72 hours, with no more than 0.1% DMSO present in culture medium. Cells were then trypsinized, resuspended in culture medium, and stained with the 9E10 alexa-fluor-conjugated antibody to NS5A [27]. Cells were fixed and analyzed for NS5A fluorescence by flow cytometry, and data were analyzed using FlowJo software. Cell toxicity in HCV infected cell cultures with compound was calculated as the relative percentage of Huh-7.5 cells that displayed characteristic forward- and side-scatter parameters compared to control infected cultures plus 0.1% DMSO. For each culture, NS5A fluorescence was determined as the percent gated cells relative to percent gated cells in infected cultures plus 0.1% DMSO. All experiments were performed in at least duplicate in at least two independent experiments.

## Results

### Virtual screening for potential Vpu inhibitors

Previously reported ligand docking simulations predict that BIT-225 and three additional acylguanidine-containing molecules interact with the pore of a pentameric bundle formed by Vpu transmembrane helices [20] (Fig. 1A). Superposition of these four structures indicates a common pharmacophore consisting of one or more aromatic rings separated by a short spacer from an H-bond acceptor and one or more H-bond donors (Fig. 1B). On the basis of this pharmacophore, we used a probability densities method [9] to virtually screen the entire p-ANAPL.

We then selected molecular configurations that emphasize low strain energy, similar shape to the four reference molecules, and similar overlap of aromatic, donor, and acceptor atoms. From this screen, 8 molecules exhibited features similar to the original pharmacophore, defined here as an RMSD > 0.6 (Fig. 1C).

## Identification of HIV-1 inhibitors

To assess the effects of these eight compounds on cell viability and HIV-1 replication, we infected a GFP-reporter CEM CD4+ T cell line (CEM-GXR) [26] with the NL4-3 strain of HIV-1 (HIV-1<sub>NL4-3</sub>). Briefly, cells were infected with HIV-1<sub>NL4-3</sub> at a multiplicity of infection of 0.03 (Day 0), followed by removal of HIV-1 and addition of compound (or 0.1% DMSO vehicle control) 24 hours later (Day 1) and incubation for an additional 72 hours to allow HIV-1 spread (Days 2–4). On Days 2 and/or 4, the percent HIV-1 infected (*i.e.*, GFP-expressing) cells was measured by flow cytometry. Cell viability was assessed by measuring the percentage of cells displaying normal forward- and side-scatter parameters in drug-treated, HIV-1 infected cultures compared to 0.1% DMSO-treated, HIV-1 infected control cultures. As shown in Fig. 2, the percent infected (GFP-positive) cells in HIV-1<sub>NL4-3</sub> infected cultures tripled between Day 2 to Day 4 (*e.g.*, 3.14 to 10.80% in Fig. 2A). HIV-1<sub>NL4-3</sub> replication was unaffected by the presence of 0.1% DMSO vehicle control (Fig. 2B).

Consistent with the previously described cytotoxic effects of Vpu inhibitor BIT-225 in T cell cultures [19, 36], treatment of infected CEM-GXR cells with this compound resulted in substantial cellular toxicity at all tested concentrations ( $CC_{50} = 10.7 \mu\text{M}$ ; Table 1; Fig. 3A), which obscured the detection of any antiviral activity in this assay. Two naturally-derived compounds, 1,5,7-trimethoxyphenanthrene-2,6-diol (PA) and knipholone anthrone (KA), also displayed cytotoxicity at low concentrations ( $CC_{50} < 30 \mu\text{M}$ ) and so measures of their antiviral activity were not reliably obtained. However, of the remaining six compounds identified from the virtual screen, two exhibited reproducible inhibition of HIV-1 replication, defined here at an  $EC_{50} < \sim 50 \mu\text{M}$  (Fig. 3B), at concentrations that were not obviously cytotoxic. These compounds were ixoratannin A-2 ( $CC_{50} = 57.5 \mu\text{M}$ ;  $EC_{50} = 34.4 \mu\text{M}$ ; selectivity index [SI] = 1.7) and boldine ( $CC_{50} = 207.7 \mu\text{M}$ ;  $EC_{50} = 50.2 \mu\text{M}$ ; SI = 4.1; Table 1).

The effects of BIT-225, boldine, and ixoratannin A-2 were also assessed for cell viability and HIV-1 replication in peripheral blood mononuclear cells (PBMCs). Similar to CEM-GXR cells, we also observed substantial cytotoxicity in PBMCs in the presence of BIT-225 ( $CC_{50} = 12.8 \mu\text{M}$ ; Fig. 3C); in contrast, viability remained above 85% relative to PBMCs in 0.1% DMSO for all assessed concentrations of boldine or ixoratannin A-2. However, a clear reduction in HIV-1 replication in PBMCs, as measured by viral p24<sup>Gag</sup> protein levels in PBMC culture supernatants, was observed with 10  $\mu\text{M}$  BIT-225 (*i.e.*, 31.8% reduced replication; Fig. 3D). For boldine, HIV-1 replication was substantially reduced only at high concentrations (47.0% reduced replication at 100  $\mu\text{M}$ ), suggesting a roughly 2-fold reduction in activity in PBMCs relative to CEM-GXR cells (Table 1). In contrast, HIV-1 replication in PBMCs in the presence of ixoratannin A-2 roughly corresponded to its activity in CEM-GXR cells (39.0% reduced replication at 25  $\mu\text{M}$ ). Unfortunately, due to the limits of available ixoratannin A-2, we were unable to assess its activity in PBMCs concentrations higher than 25  $\mu\text{M}$ .

## Anti-HIV mechanisms of action of ixoratannin A-2 and boldine

To investigate the mechanisms by which ixoratannin A-2 and boldine may block HIV-1 replication, we used a previously-reported HIV-1<sub>NL4-3</sub> strain lacking the Vpu coding region (HIV-1 <sub>$\Delta$ Vpu</sub>) [29]. We also constructed recombinant HIV-1<sub>NL4-3</sub> strains harboring protease, reverse transcriptase, and/or integrase sequences of HIV-1 strains from patients who had developed

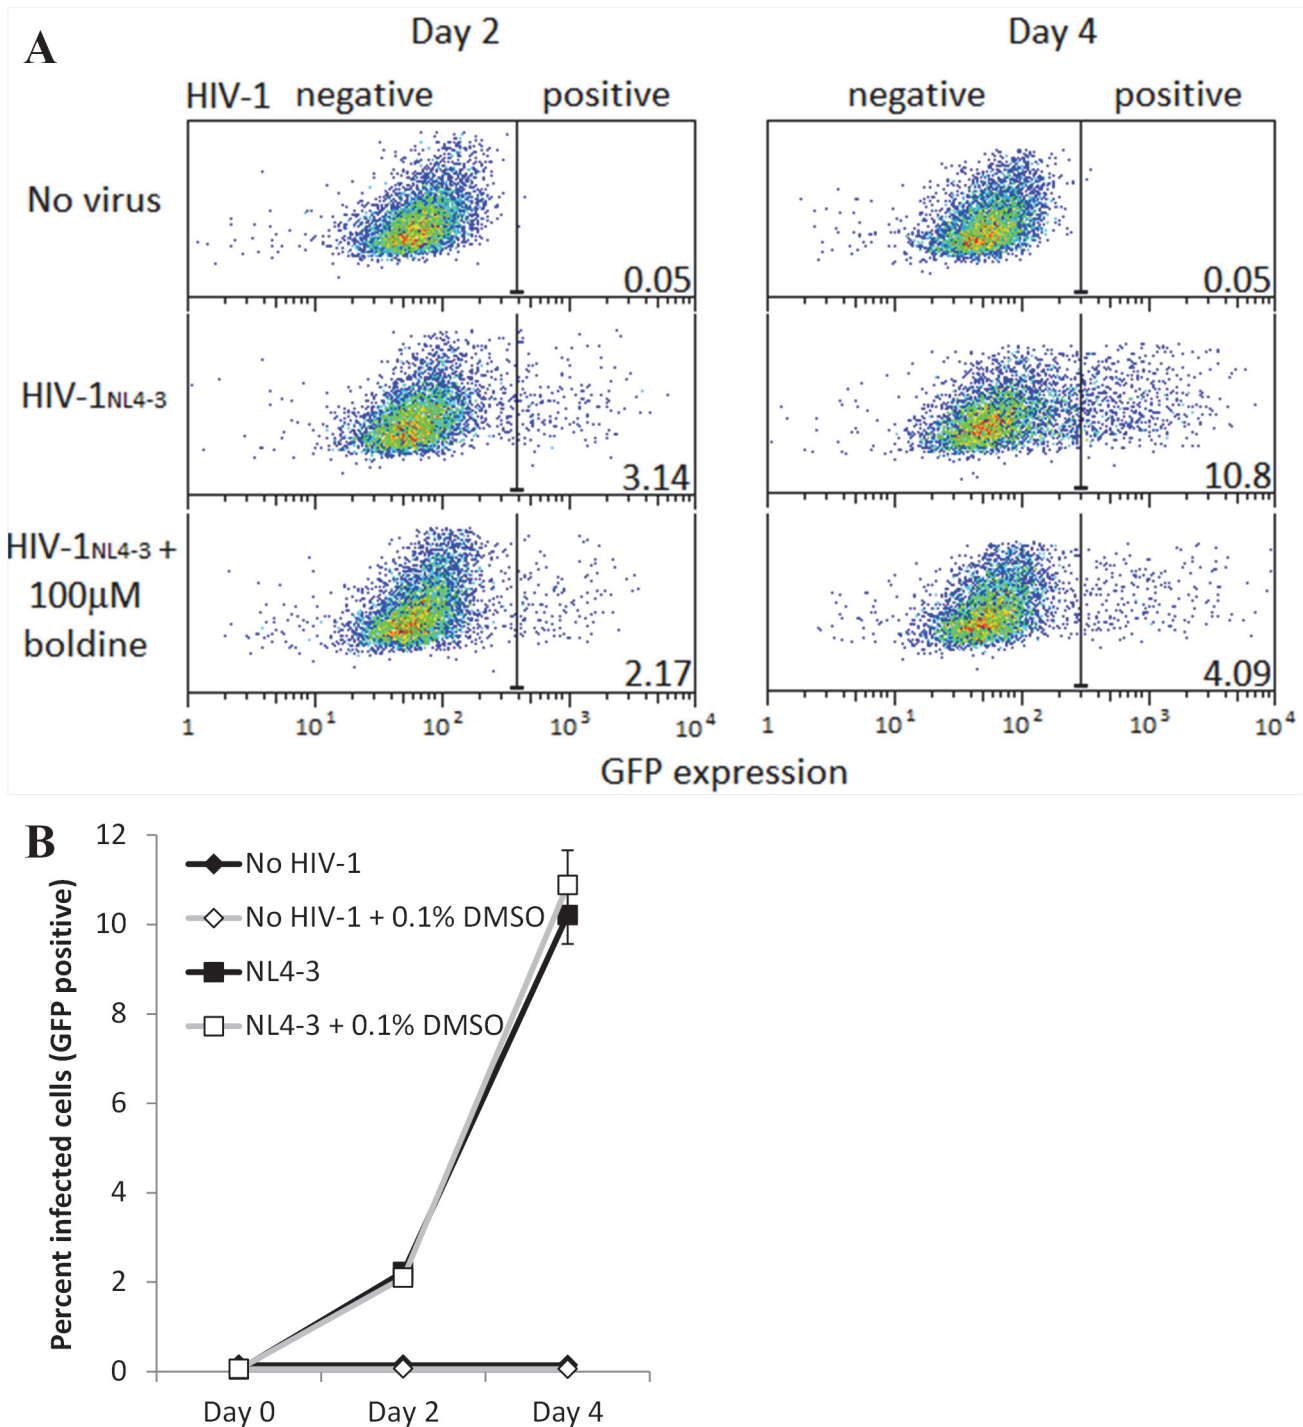

**Fig 2. HIV-1 replication in CEM-GXR cells.** **A**, Flow cytometry data showing GFP expression from uninfected (top), HIV-1<sub>NL4-3</sub>-infected cells (center), and HIV-1<sub>NL4-3</sub>-infected cells plus 100 μM boldine (bottom) at Days 2 and 4. Values at the bottom-right of each panel indicate the percent GFP-positive (*i.e.*, HIV-infected) cells. Background GFP expression is set to 0.05% in uninfected cell cultures. **B**, Percent infected cells, as measured by GFP expression, in cultures of CEM-GXR cells +/- HIV-1 and +/- 0.1% DMSO vehicle control. Data in **B** and **A** are from independent experiments.

doi:10.1371/journal.pone.0121099.g002

resistance to the protease inhibitor Indinavir (IND), the non-nucleoside reverse transcriptase inhibitor Efavirenz (EFV), and/or the integrase inhibitor Raltegravir (RAL) (denoted HIV-1<sub>PR+RT</sub>,



**Table 1. Cell toxicity and inhibition of HIV-1<sub>NL4-3</sub> in CEM-GXR cells by p-ANAPL compounds.**

| Compound        | Cell toxicity (CC50, $\mu$ M) | HIV-1 <sub>NL4-3</sub> inhibition (EC50, $\mu$ M) |
|-----------------|-------------------------------|---------------------------------------------------|
| BIT-225         | 10.7                          | n/d                                               |
| geshoidin       | >10                           | >100                                              |
| 2MA             | 50.9                          | >100                                              |
| KA              | 0.9                           | n/d                                               |
| boldine         | >100                          | 50.2                                              |
| PA              | 26.8                          | n/d                                               |
| ECG             | >100                          | >100                                              |
| EA              | 52.3                          | >100                                              |
| ixoratannin A-2 | 57.5                          | 34.4                                              |

n/d, not determined.

doi:10.1371/journal.pone.0121099.t001

HIV-1<sub>RT</sub>, and HIV-1<sub>INT</sub>, respectively). Re-sequencing of the recombinant viruses confirmed the presence of multiple mutations known to confer resistance to IND, EFV, and/or RAL (Table 2) [5].

As expected, replication of both HIV-1<sub>NL4-3</sub> and HIV-1 <sub>$\Delta$ Vpu</sub> in CEM-GXR cells were inhibited in the presence of 0.1  $\mu$ M EFV, IND, or RAL (Fig. 4). In contrast, HIV-1<sub>PR+RT</sub>, HIV-1<sub>RT</sub>, and HIV-1<sub>INT</sub> were significantly less sensitive to these drugs in a pattern consistent with specific resistance mutations. For example, HIV-1<sub>PR+RT</sub> replication was 2.6-fold higher than HIV-1<sub>NL4-3</sub> in the presence 0.1  $\mu$ M EFV and 2.7-fold higher in the presence of 0.1  $\mu$ M IND. Similarly, HIV-1<sub>RT</sub> replication in CEM-GXR cells was 3.4-fold greater than HIV-1<sub>NL4-3</sub> replication in the presence of 0.1  $\mu$ M EFV. Finally, HIV-1<sub>INT</sub> replication was 1.7-fold higher than HIV-1<sub>NL4-3</sub> in the presence of 0.1  $\mu$ M RAL, confirming that these mutations underlie resistance to specific ARVs. The residual replication of HIV-1<sub>NL4-3</sub> and HIV-1 <sub>$\Delta$ Vpu</sub> in the presence of licensed ARVs to which they are susceptible is likely attributable to our high infection of cell cultures for 24 hours prior to addition of compounds.

When compared to HIV-1<sub>NL4-3</sub>, 75  $\mu$ M of ixoratannin A-2 was 1.4-fold less effective at inhibiting HIV-1 <sub>$\Delta$ Vpu</sub> in CEM-GXR cells, a modest difference that was nevertheless statistically significant (Fig. 5A). This difference translated into a 1.5-fold increase in the EC<sub>50</sub> (EC<sub>50</sub> = 52.0  $\mu$ M against HIV-1 <sub>$\Delta$ Vpu</sub> vs. 34.4  $\mu$ M against HIV-1<sub>NL4-3</sub>; Table 3). This supports Vpu as a direct or indirect target, among possibly others, of ixoratannin A-2. Furthermore, although not reaching statistical significance, treatment with 75  $\mu$ M of boldine was 1.3-fold less effective at inhibiting HIV-1 <sub>$\Delta$ Vpu</sub> (Fig. 5B), resulting in an EC<sub>50</sub> > 100  $\mu$ M compared to 50.2  $\mu$ M for HIV-1<sub>NL4-3</sub> (Table 3). This suggests that boldine may primarily confer anti-HIV-1 activity by acting on additional targets other than Vpu.

While 75  $\mu$ M of ixoratannin A-2 was somewhat less effective in blocking replication of HIV-1<sub>PR+RT</sub> and HIV-1<sub>INT</sub> in CEM-GXR cells (both exhibited 1.5-fold higher replication than HIV-1<sub>NL4-3</sub> at this concentration; Fig. 5C), the EC<sub>50</sub>s of ixoratannin A-2 against these resistant HIV-1 strains approximated that of HIV-1<sub>NL4-3</sub> (Table 3). This suggests that ixoratannin A-2 exhibits comparable activity against wild-type HIV-1<sub>NL4-3</sub> as well as HIV-1 strains resistant to currently-licensed protease, reverse transcriptase, and integrase inhibitors, except perhaps at very high concentrations. In contrast, treatment with boldine resulted in < 50% inhibition of all ARV-resistant HIV-1 strains at concentrations up to 75 or 100  $\mu$ M (Fig. 5D), corresponding to EC<sub>50</sub>s > 100  $\mu$ M for these ARV-resistant strains compared to 50.2  $\mu$ M for HIV-1<sub>NL4-3</sub> (Table 3). In particular, boldine was less effective at blocking replication of HIV-1<sub>PR+RT</sub>, with 1.4 and 1.5-fold greater replication vs. HIV-1<sub>NL4-3</sub> at 25 and 75  $\mu$ M, suggesting that it may act

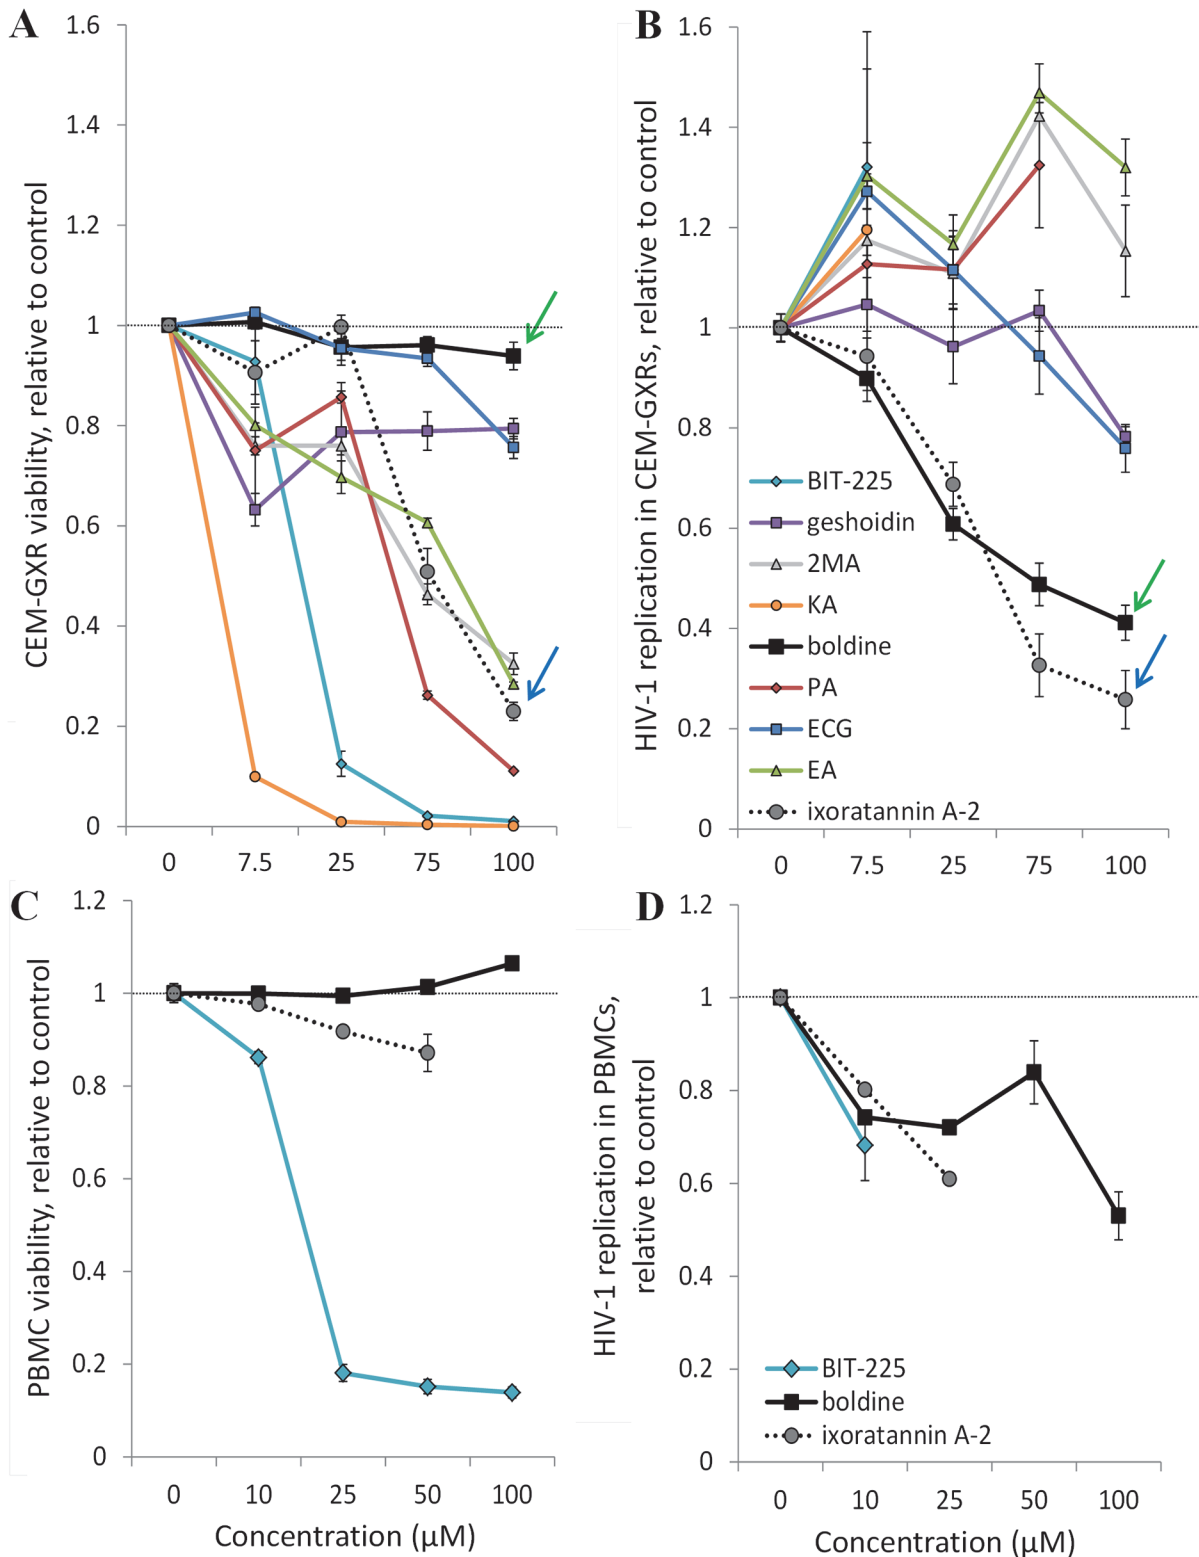

**Fig 3. Effects of p-ANAPL compounds on cell viability and *in vitro* HIV-1 replication.** **A**, CEM-GXR cell viability at Day 4 in the presence of p-ANAPL compounds at defined concentrations. Data are normalized to the percent of viable cells in an HIV-1<sub>NL4-3</sub>-infected culture plus 0.1% DMSO. **B**, HIV-1 replication in CEM-GXR cells at Day 4 in the presence of compounds. Data are normalized to percent HIV-1<sub>NL4-3</sub>-infected cells plus 0.1% DMSO. Dose-response plots of ixoratannin A-2 and boldine are highlighted with blue and green arrows, respectively. **C**, PBMC viability at Day 5 in the presence of p-

ANAPL compounds. Data are normalized to the percent of viable cells in an uninfected culture plus 0.1% DMSO. **D**, HIV-1 replication in PBMCs at Day 12 in the presence of p-ANAPL compounds, as measured by p24<sup>Gag</sup> levels in cell culture supernatants. Data are normalized to percent HIV-1<sub>NL4-3</sub>-infected cells plus 0.1% DMSO.

doi:10.1371/journal.pone.0121099.g003

as an HIV-1 protease inhibitor with some cross-resistance to reverse transcriptase and integrase inhibitors.

### Anti-hepatitis C virus activity of ixoratannin A-2 and boldine

As ixoratannin A-2 and boldine potentially acted on multiple HIV-1 targets and exhibited no obvious cellular toxicity, we asked whether these compounds blocked replication of other viruses. We therefore assessed the effects of ixoratannin A-2, boldine, and BIT-225 on replication of HCV, which also encodes a viral ion channel and protease [37]. Using an established cell culture system [27], Huh-7.5 cells were infected with an intergenotypic chimera between the J4 (genotype 1b) and JFH1 (genotype 2a) strain of HCV for 6 hours, followed by incubation with fresh medium containing compounds at defined concentrations. Infected cells were then incubated for an additional 72 hours. NS5A expression, a marker of HCV infection, was then detected by flow cytometry.

Interestingly, at 72 hours post-infection, no major cytotoxicity (defined here as at least 20% fewer gated cells compared to infected cells + 0.1% DMSO vehicle control) was observed at any concentration with the exception of BIT-225 (Fig. 6A) with a calculated CC<sub>50</sub> of 52.9 μM. However, BIT-225 did inhibit HCV replication in surviving Huh-7.5 cells, with 37.5% inhibition at 30 μM (Fig. 6B). Boldine also inhibited HCV replication with efficacy similar to rimantadine [38], a previously-reported inhibitor of the HCV-encoded p7 ion channel and HCV replication (e.g., 36.0% and 40.7% inhibition at 50 μM for boldine and rimantadine, respectively). In contrast, ixoratannin A-2 was the most potent compound at all tested concentrations (Fig. 6B), with >50% inhibition of HCV at 30 μM and a calculated EC<sub>50</sub> of 23.0 μM. The relatively low activity of control inhibitors like rimantadine and BIT-225 compared to previous reports [38, 39] are likely to reflect the stringent antiviral conditions of this assay, which features a 6 hour infection step before addition of drug in addition to a high multiplicity of infection (0.3).

### Discussion

The development of new therapeutics against HIV is necessary to counter the risks of resistance to established ARVs, particularly in countries with high disease burden and limited health care infrastructure. Here we used a common pharmacophore derived from a series of reported HIV-1 Vpu ion channel interactors [20] to perform a virtual screen of p-ANAPL molecules to identify compounds with potential new modes of action against HIV. Of eight molecules identified in this screen, two were observed to inhibit *in vitro* HIV-1 replication in a CD4+ T cell line as well as PBMCs. These compounds, ixoratannin A-2 and boldine, also had

**Table 2. Properties of HIV-1 strains lacking Vpu or encoding mutations that underlie resistance to ARVs.**

| HIV-1 strain | Protein               | Primary mutation(s)            | Resistance to ARVs tested |
|--------------|-----------------------|--------------------------------|---------------------------|
| Δvpu         | vpu                   | vpu open reading frame deleted | n/a                       |
| PR+RT        | protease              | M46L, I54V, I84V, L90M         | IND + EFV                 |
|              | reverse transcriptase | K101E, Y181C, G190A            |                           |
| RT           | reverse transcriptase | K103N, V108I, M230L            | EFV                       |
| INT          | integrase             | N155H                          | RAL                       |

doi:10.1371/journal.pone.0121099.t002

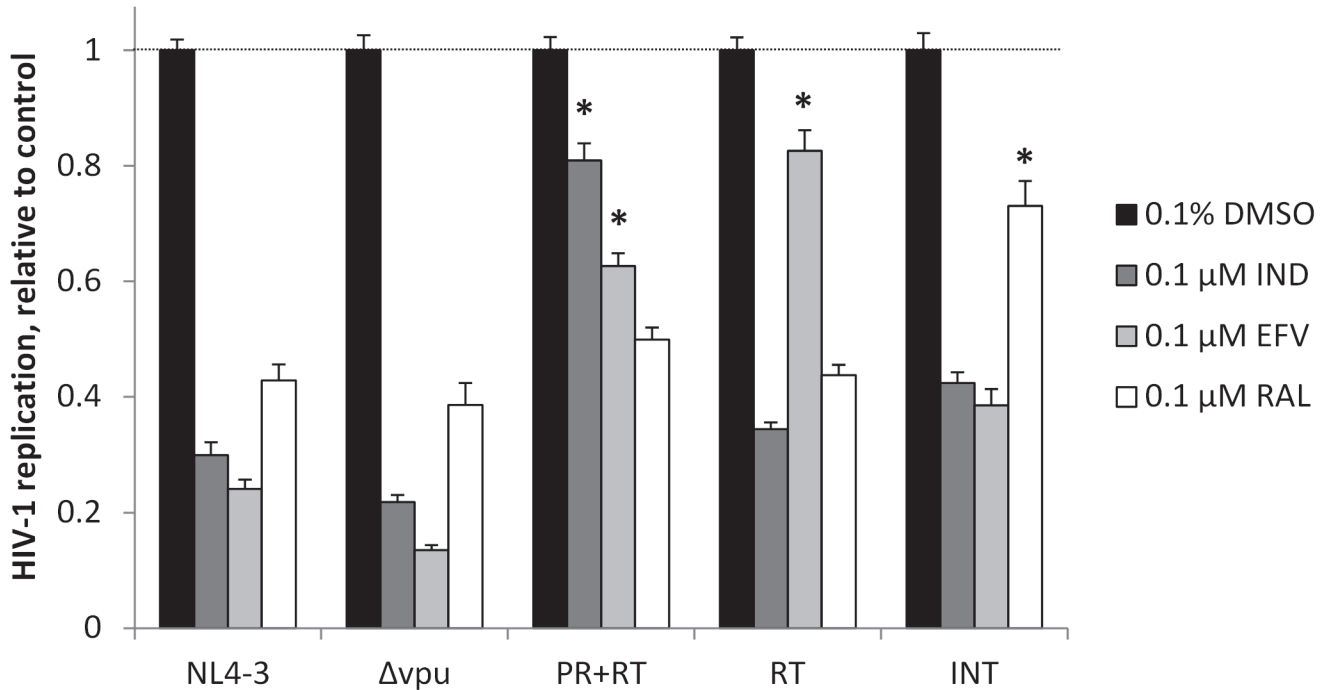

**Fig 4. Replication of HIV-1<sub>NL4-3</sub>, HIV-1<sub>Δvpu</sub>, and drug-resistant HIV-1 strains in CEM-GXR cells.** Data shown are at Day 4 in the presence of 0.1 μM of established ARVs, relative to the replication rate of each HIV-1 strain in the presence of 0.1% DMSO vehicle control. \*, p < 0.004 vs. HIV-1<sub>NL4-3</sub> replication.

doi:10.1371/journal.pone.0121099.g004

limited effects on cell viability when compared to their antiviral activities (e.g., selectivity indices (SIs) for ixorotannin A-2 and boldine in CEM-GXR cells were 1.7 and 4.1, respectively). Of the remaining six compounds, four did not inhibit HIV-1 replication in CEM-GXR cells at up to 100 μM, while two were highly cytotoxic (CC<sub>50</sub>s < 30 μM), which precluded detection of antiviral activity in this assay. We note that the limited anti-HIV activity of boldine and ixorotannin A-2, when compared to licensed ARVs, emphasizes that these compounds are at best starting points for new therapeutic development and are unlikely to exhibit any clinical benefit themselves. The limited anti-HIV activities of boldine and ixorotannin A-2 are also supported by experiments with HIV-1-infected PBMCs, where the antiviral activities of these compounds at 10 μM did not improve on the antiviral activity of 10 μM BIT-225, a molecule currently in phase I clinical trials [40].

Nevertheless, our results validate the strategy of using common pharmacophores from known and putative ion channel inhibitors to identify new antiviral compounds from natural products. Our results also highlight the p-ANAPL, a library of pure compounds derived from African plants with locally-reported medicinal properties [8, 9], as a viable source of therapeutically-relevant antiviral prototypes. As our initial screen here focused only on potential inhibitors of Vpu ion channel activity with structural similarity to known and putative Vpu inhibitors, additional compounds from p-ANAPL may also inhibit HIV-1 replication via similar or additional mechanisms. Assessment of these and other compounds for inhibitory activity against HIV and other pathogens is therefore underway.

Notably, we found that the Vpu inhibitor BIT-225, despite showing activity against HIV-1 and HCV replication in line with previous reports [19, 39], was highly toxic to CEM-GXR T cells (CC<sub>50</sub> = 10.7 μM) and PBMCs (CC<sub>50</sub> = 12.8 μM). The high cytotoxicity of BIT-225 in CEM-GXR cells precluded our ability to measure its antiviral activity in these cells, although antiviral activity of 10 μM BIT-225 was observed in PBMCs (31.8% inhibition). Our results

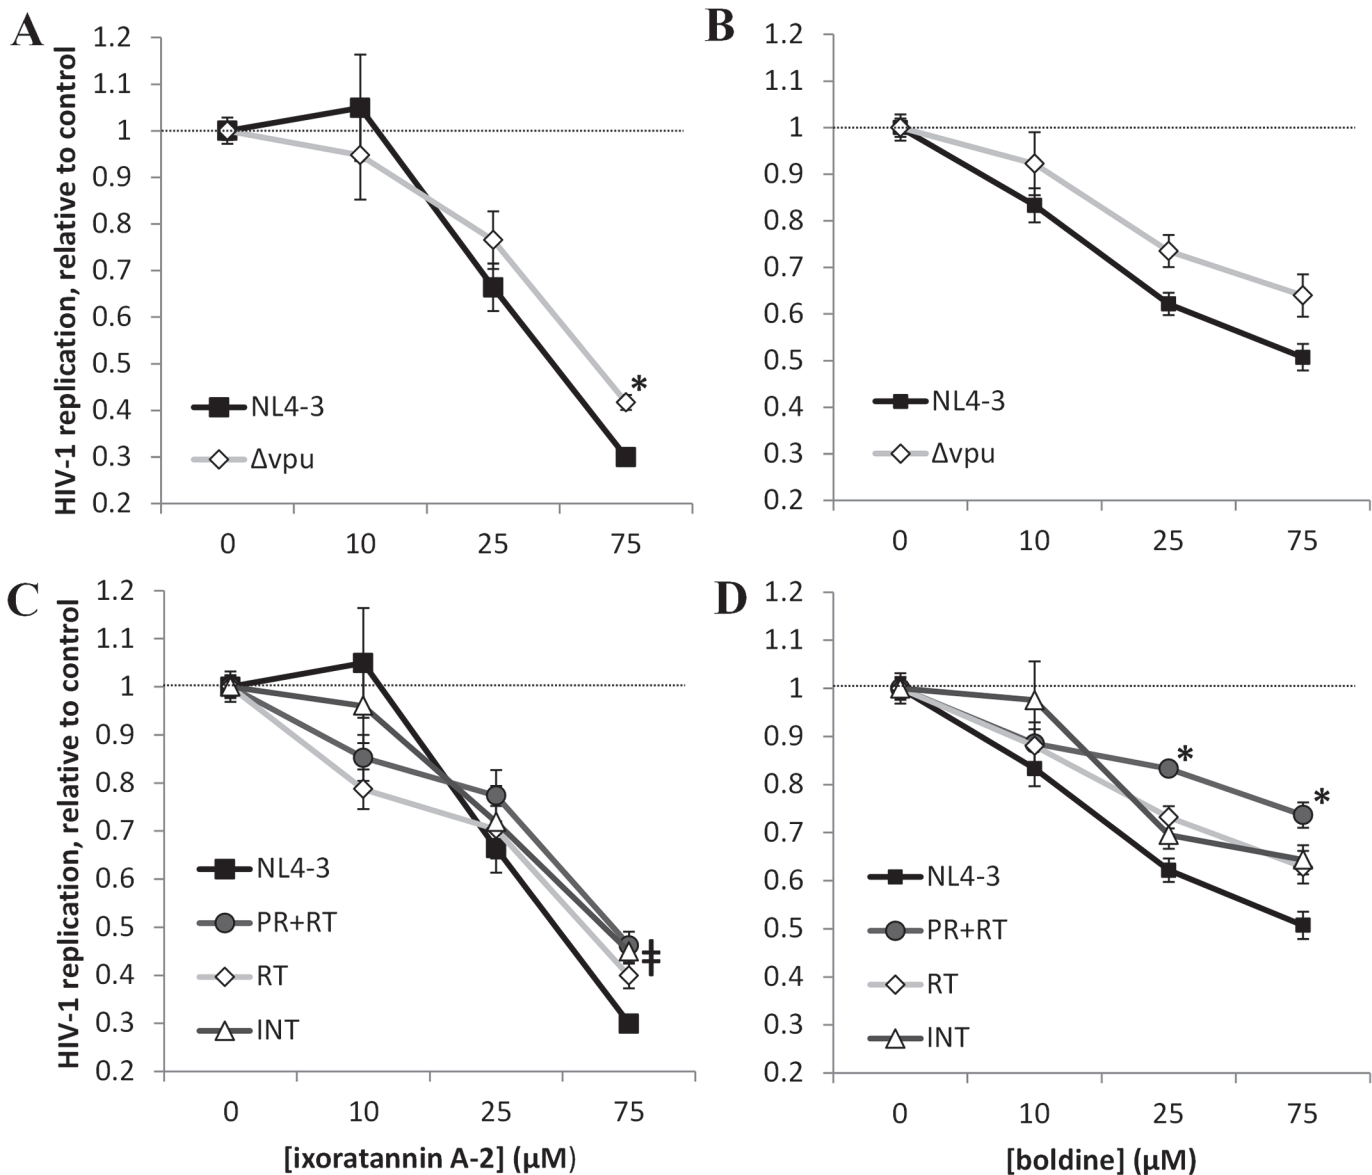

**Fig 5. Effects of ixorattannin A-2 and boldine on replication of HIV-1<sub>Δvpu</sub> and ARV-resistant HIV-1 strains in CEM-GXR cells.** In all experiments, data are normalized to the replication rate of each HIV-1 strain plus 0.1% DMSO at Day 4. **A-B**, effects of ixorattannin A-2 (**A**) and boldine (**B**) on HIV-1<sub>NL4-3</sub> and HIV-1<sub>Δvpu</sub> replication. **C-D**, effects of ixorattannin A-2 (**C**) and boldine (**D**) on replication of ARV-resistant HIV-1 strains. \*,  $p < 0.008$  vs. HIV-1<sub>NL4-3</sub> at the same concentration of ixorattannin A-2 or boldine. †,  $p < 0.008$  for strain HIV-1<sub>PR+RT</sub> and HIV-1<sub>INT</sub> vs. HIV-1<sub>NL4-3</sub> at same concentration of ixorattannin A-2.

doi:10.1371/journal.pone.0121099.g005

contrast with previous studies that show minimal cytopathic effects of BIT-225 in monocyte derived macrophages ( $CC_{50}S = 167-284 \mu M$ ) and SupT1 and CEM-SS cells ( $CC_{50}S = 32-$

**Table 3. Calculated EC<sub>50</sub>s of ixorattannin A-2 and boldine on HIV-1<sub>Δvpu</sub> and ARV-resistant HIV-1 strains.**

| Compound         | EC <sub>50</sub> (μM)  |                       |                        |                     |                      |
|------------------|------------------------|-----------------------|------------------------|---------------------|----------------------|
|                  | HIV-1 <sub>NL4-3</sub> | HIV-1 <sub>Δvpu</sub> | HIV-1 <sub>PR+RT</sub> | HIV-1 <sub>RT</sub> | HIV-1 <sub>INT</sub> |
| ixorattannin A-2 | 34.4                   | 52.0                  | 36.4                   | 33.7                | 38.4                 |
| boldine          | 50.2                   | >100                  | >100                   | >100                | >100                 |

doi:10.1371/journal.pone.0121099.t003

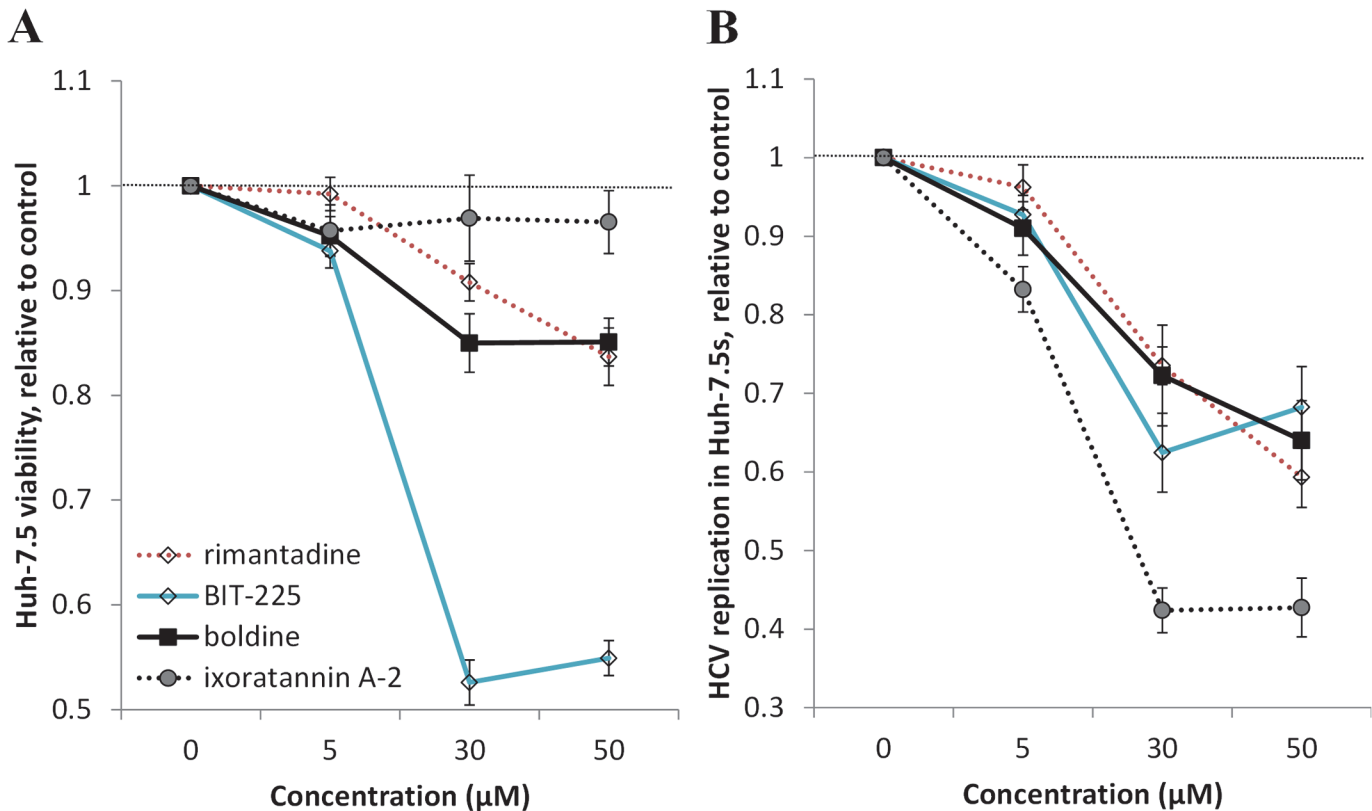

**Fig 6. Effects of compounds on HCV replication.** **A**, Cell viability at 72 h post-infection in the presence of compounds at defined concentrations. Data are normalized to the percent of viable cells in a HCV-infected culture plus 0.1% DMSO. **B**, HCV replication at 72 h post-infection in the presence of compounds. Data are normalized to percent HCV-infected cells plus 0.1% DMSO.

doi:10.1371/journal.pone.0121099.g006

67 μM) [36, 39]. However, bovine viral diarrhea virus-infected Madin-Darby bovine kidney cells were also reported to be sensitive to low levels of BIT-225 ( $CC_{50} = 11.6 \mu\text{M}$ ) [41], and we also observed that Huh-7.5 cells ( $CC_{50} = 52.9 \mu\text{M}$ ) are relatively tolerant to BIT-225 when compared to CEM-GXR cells and PBMCs. Thus, certain cell-types and cell lines, in addition to subsets of cells in PBMC cultures, likely differ in their sensitivity to BIT-225. Despite this, however, BIT-225 has advanced to early clinical trials to treat HCV and HIV-1 [41], where initial reports suggest that the disease-modifying activity of BIT-225 may be sufficient to overcome the potential adverse effects of cellular toxicity.

Of the two virtual screening hits found here, ixoratannin A-2 exhibited the lower selectivity index of blockade of HIV-1 replication over cytotoxicity in CEM-GXR cells ( $SI = 1.7$ ). Ixoratannin A-2 is a doubly-linked, A-type proanthocyanidin trimer isolated from the *Ixora coccinea* shrub of western Nigeria and traditionally used to treat infections, hypertension, menstrual irregularities, chronic ulcers, and skin diseases [21]. This compound contains three epicatechin units and has structural similarity to other flavanols and flavan-3-ols previously reported to have anti-HIV activity by targeting reverse transcriptase and integrase [2, 40, 42–43]. While we did not observe significant differences in the inhibition of EFV and RAL-resistant HIV-1 strains by ixoratannin A-2, except in some cases at 75 μM, these discrepancies could reflect differential modes of inhibition by ixoratannin A-2 compared to the mutant reverse transcriptase and integrase sequences examined here.

Evidence for Vpu as a possible target of ixoratannin A-2 comes from its modest (1.4-fold) inability to inhibit HIV-1 lacking a functional Vpu protein (HIV-1 $_{\Delta\text{Vpu}}$ ). However, additional

proof that ixoratannin A-2 directly blocks Vpu ion channel activity awaits detailed electrophysiology-based pharmacology studies in whole cells, which have been reported by some groups [14, 15, 44] but are disputed by others [16]. Moreover, as HIV-1 $_{\Delta\text{Vpu}}$  resistance to ixoratannin A-2 was incomplete and occurred only at high concentrations (*i.e.*, 75  $\mu\text{M}$ ), additional viral or host targets may exist. These possibilities require further study. Notably, ixoratannin A-2 inhibited multiple ARV-resistant HIV-1 strains with comparable EC<sub>50</sub>s to wild-type HIV-1 $_{\text{NL4-3}}$ , indicating that it retains activity against HIV-1 harboring mutations that confer resistance to IND, EFV, or RAL, except at high concentrations. Thus ixoratannin A-2 and related compounds may indicate a potential therapeutic path toward overcoming resistance to EFV, IND, and RAL.

Boldine is an alkaloid aporphine that was originally isolated from the Chilean boldo tree (*Peumus boldus*) but is also found in many plants of African origin [45]. It is best characterized for its antioxidant, anti-inflammatory, and hepatoprotective properties and has been proposed as a potential therapy to treat cardiovascular, neurodegenerative, metabolic, and other inflammation-based diseases [46]. It is also reported to have antiplasmodial, anticancer, immunomodulatory and anticonvulsant properties [45]. Antiviral activity is also reported for other apomorphines, for example against HIV, poliovirus, rhinovirus, herpes simplex virus type 1, and influenza, although boldine itself was assessed in only a few of these studies, where no anti-polio virus or anti-herpes virus activity was observed [47–51].

While HIV-1 $_{\Delta\text{Vpu}}$  was less responsive to treatment with boldine at multiple concentrations, these differences were not statistically significant and suggest that the discovery of boldine by virtual screening for similarity to other HIV-1 Vpu inhibitors may have been fortuitous. However, boldine has been reported to block hERG potassium channel currents, as measured by two electrode voltage clamp studies in *Xenopus* oocytes (IC<sub>50</sub> = 19.3  $\mu\text{M}$ ) [52]. It is also an inhibitor of human 5-HT<sub>3</sub> receptor ion channels, nicotinic acetylcholine receptors, and calcium channels at low micromolar concentrations [45, 53–55]. Thus, given its precedent as a promiscuous ion channel inhibitor, the anti-Vpu activity of boldine should also be confirmed in electrophysiological studies. We also found increased viral replication of all ARV-resistant viral strains, and HIV-1 $_{\text{PR+RT}}$  in particular, in the presence of boldine (*e.g.*, 1.4-fold increased replication vs. HIV-1 $_{\text{NL4-3}}$ ). Thus, in addition to Vpu, HIV-1 protease, reverse transcriptase, and integrase are all potentially targets of boldine.

We also observed that ixoratannin A-2 and boldine inhibit HCV replication with similar or improved efficacy to rimantadine, an HCV ion channel inhibitor that is undergoing patient recruitment for a phase II clinical trial [56]. The activity of ixoratannin A-2 is also improved relative to BIT-225, which is also undergoing clinical trials for HCV [41]. Although recently developed second-generation HCV protease inhibitors like Simeprevir display dramatically higher cure rates in HIV/HCV co-infected patients when compared to established pegylated interferon/ribavirin combination HCV therapies [57], morbidity in HIV/HCV co-infected patients—notably hepatocellular carcinoma and advanced liver damage—remains a concern [58]. Furthermore, it remains unclear whether these second-generation inhibitors can be effectively distributed to regions with limited healthcare infrastructure that has hampered access to ARVs. Therefore, ixoratannin A-2 and boldine could represent possible scaffolds for therapies to target HCV or HIV-1/HCV co-infection in the absence of established alternatives. These results also support the potential of ixoratannin A-2 and boldine for broad-spectrum antiviral activity, which should be assessed in additional viral systems.

No additional compounds were identified here to inhibit HIV-1. PA resembles stilbenoids isolated from the fruit of *Combretaceae hereroense* with reported antibacterial activity [22], and KA also has reported antibacterial, antifungal, antiprotozoal, antitumor, and antioxidant properties [23]. However, both of these compounds were cytotoxic in our viral assay (respective

CC<sub>50</sub>s = 26.8 and 0.9 μM), making them poor candidates for further antiviral development at this stage. The potential antiviral activities of PA and KA will need to be assessed using alternative viral, enzymatic, or electrophysiological assays. We also did not observe antiviral activity for epicatechin gallate (ECG), which was previously reported to have anti-reverse transcriptase and integrase activities in enzymatic assays [2, 21, 40] but no antiviral activity in T cell lines [59]. Similarly, ellagic acid (EA) derivatives are reported to block HIV protease, integrase, and reverse transcriptase [60–62] but we did not observe these activities in our viral replication system. Finally, geshoidin, previously reported to inhibit glutathione transferases [24], and 1-(3-acetyl-2,4-dihydroxy-6-((3,4,5,6-tetrahydroxytetrahydro-2H-pyran-2-yl)oxy)phenyl)-4,5-dihydroxy-2-methylanthracene-9,10-dione (2MA), which is structurally similar to compounds reported with tumor cytotoxic activity [25], also did not inhibit HIV-1 in our assay.

In conclusion, we report that pure compounds obtained from African medicinal plants, as part of the p-ANAPL, are a viable source of prototype antivirals. We identify new chemical scaffolds that may inform further development of natural product and/or synthetic HIV-1 inhibitors that act on ARV-resistant viral strains and alternative viral targets like Vpu, and we also provide new options for future anti-HIV and/or HCV therapies that might be suitable for local production.

## Acknowledgments

We thank Josephine Bipa for natural product collection, Doug Chou, Tao Sheng, Pouria H. Jalily, and Luping Yan for chemistry technical assistance, Aniqah Shahid and Natalie Kinloch for assistance with viral assays, and Richard Harrigan and Bruce Walker for provision of patient-derived HIV sequences containing resistance mutations.

## Author Contributions

Conceived and designed the experiments: IT MAB ZLB DF CMR. Performed the experiments: IT PM MS KAM TOI AOO BMA FNK PAO LMM. Analyzed the data: IT KAM TOI AOO BMA FNK PAO LMM MS MAB ZLB. Contributed reagents/materials/analysis tools: KAM TOI AOO BMA FNK PM. Wrote the paper: IT MAB ZLB DF.

## References

1. UNAIDS. UNAIDS Access to antiretroviral therapy in Africa—Status report on progress towards the 2015 targets. Available: [www.unaids.org/en/media/unaids/contentassets/documents/unaidspublication/2013/20131219\\_AccessARTAfricaStatusReportProgressTowards2015Targets\\_en.pdf](http://www.unaids.org/en/media/unaids/contentassets/documents/unaidspublication/2013/20131219_AccessARTAfricaStatusReportProgressTowards2015Targets_en.pdf). Accessed 2014 Oct 22.
2. Andrae-Marobela K, Ghislain FW, Okatch H, Majinda RRT. Polyphenols: a diverse class of multi-target anti-HIV-1 agents. *Curr Drug Metab*. 2013; 14: 392–413. PMID: [23330927](https://pubmed.ncbi.nlm.nih.gov/23330927/)
3. Deeks SG, Kar S, Gubernick SI, Kirkpatrick P. Raltegravir. *Nat Rev Drug Discov*. 2008; 7: 117–118.
4. Porrimmer Y, Johnson AA, Marchand C. Integrase inhibitors to treat HIV/AIDS. *Nat Rev Drug Discov*. 2014; 4: 236–428.
5. Wensing AM, Calvez V, Günthard HF, Johnson VA, Paredes R, Pillay D, et al. 2014 update on the drug resistance mutations in HIV-1. *Top Antivir Med*. 2014; 22: 642–650. PMID: [25101529](https://pubmed.ncbi.nlm.nih.gov/25101529/)
6. Hamers RL, Wallis CL, Kityo C, Siwale M, Mandaliya K, Conradie F, et al. HIV-1 drug resistance in anti-retroviral-naïve individuals in sub-Saharan Africa after rollout of antiretroviral therapy: a multicentre observational study. *Lancet Infect Dis*. 2011; 11: 750–759. doi: [10.1016/S1473-3099\(11\)70149-9](https://doi.org/10.1016/S1473-3099(11)70149-9) PMID: [21802367](https://pubmed.ncbi.nlm.nih.gov/21802367/)
7. Naithani R, Huma LC, Holland LE, Shukla D, McCormick DL, Mehta RG, et al. Antiviral activity of phytochemicals: a comprehensive review. *Mini Rev Med Chem*. 2008; 8: 1106–1133. PMID: [18855727](https://pubmed.ncbi.nlm.nih.gov/18855727/)
8. Geary TG, Ubalijoro E. Searching for drugs that target multiple receptors for anthelmintics from African natural products. In: Chibale K, Davies-Coleman M, Masimirembwa C, editors. *Drug Discovery in Africa: impacts of genomics, natural products, traditional medicines, insights into medicinal chemistry*,



- and technology platforms in pursuit of new drugs. Springer-Verlag Berlin Heidelberg; 2012. pp. 127–150.
9. Ntie-Kang F, Onguéné PA, Fotso GW, Andrae-Marobela K, Bezabih M, Ndom JC, et al. Virtualizing the p-ANAPL library: A step towards drug discovery from African medicinal plants. *PLOS ONE*. 2014; 9: e90655. doi: [10.1371/journal.pone.0090655](https://doi.org/10.1371/journal.pone.0090655) PMID: [24599120](https://pubmed.ncbi.nlm.nih.gov/24599120/)
  10. Fischer WB, Li LH, Mahato DR, Wang YT, Chen C. Viral channel proteins in intracellular protein-protein communication: Vpu of HIV-1, E5 of HPV16 and p7 of HCV. *Biochim Biophys Acta*. 2014; 1838: 1113–1121. doi: [10.1016/j.bbame.2013.08.017](https://doi.org/10.1016/j.bbame.2013.08.017) PMID: [24035804](https://pubmed.ncbi.nlm.nih.gov/24035804/)
  11. Strebel K. HIV-1 Vpu—an ion channel in search of a job. *Biochim Biophys Acta*. 2014; 1838: 1074–1081. doi: [10.1016/j.bbame.2013.06.029](https://doi.org/10.1016/j.bbame.2013.06.029) PMID: [23831603](https://pubmed.ncbi.nlm.nih.gov/23831603/)
  12. Stephens EB, McCormick C, Pacyniak E, Griffin D, Pinson DM, Sun F, et al. Deletion of the Vpu sequences prior to the env in a simian-human immunodeficiency virus results in enhanced env precursor synthesis but is less pathogenic for pig-tailed macaques. *Virology*. 2002; 293: 252–261. PMID: [11886245](https://pubmed.ncbi.nlm.nih.gov/11886245/)
  13. Ewart GD, Sutherland T, Gage PW, Cox GB. The Vpu protein of human immunodeficiency virus type 1 forms cation-selective ion channels. *J Virol*. 1996; 70: 7108–7115. PMID: [8794357](https://pubmed.ncbi.nlm.nih.gov/8794357/)
  14. Schubert U, Ferrer-Montiel AV, Oblatt-Montal M, Henklein P, Strebel K, Montal M. Identification of an ion channel activity of the Vpu transmembrane domain and its involvement in the regulation of virus release from HIV-1—infected cells. *FEBS Lett*. 1996; 398: 12–18. PMID: [8946945](https://pubmed.ncbi.nlm.nih.gov/8946945/)
  15. Bolduan S, Votteler J, Lodermeier V, Greiner T, Koppensteiner H, Schindler M, et al. Ion channel activity of HIV-1 Vpu is dispensable for counteraction of CD317. *Virology*. 2011; 416: 75–85. doi: [10.1016/j.virol.2011.04.009](https://doi.org/10.1016/j.virol.2011.04.009) PMID: [21601230](https://pubmed.ncbi.nlm.nih.gov/21601230/)
  16. Coady MJ, Daniel NG, Tiganos E, Allain B, Friberg J, Lapointe JY, et al. Effects of Vpu expression on *Xenopus* oocyte membrane conductance. *Virology*. 1998; 244: 39–49. PMID: [9581776](https://pubmed.ncbi.nlm.nih.gov/9581776/)
  17. Gazina EV, Petrou S. Viral targets of acylguanidines. *Drug Discov Today*. 2012; 17: 1039–1043. doi: [10.1016/j.drudis.2012.05.002](https://doi.org/10.1016/j.drudis.2012.05.002) PMID: [22580299](https://pubmed.ncbi.nlm.nih.gov/22580299/)
  18. Ewart GD, Nasr N, Naif H, Cox GB, Cunningham AL, Gage PW. Potential new anti-human immunodeficiency virus type 1 compounds depress virus replication in cultured human macrophages. *Antimicrob Agents Chemother*. 2004; 48: 2325–2330. PMID: [15155246](https://pubmed.ncbi.nlm.nih.gov/15155246/)
  19. Khohury G, Ewart G, Luscombe C, Miller M, Wilkinson J. Antiviral efficacy of the novel compound BIT225 against HIV-1 release from human macrophages. *Antimicrob Agents Chemother*. 2010; 54: 835–845. doi: [10.1128/AAC.01308-09](https://doi.org/10.1128/AAC.01308-09) PMID: [19995924](https://pubmed.ncbi.nlm.nih.gov/19995924/)
  20. Patargias G, Ewart G, Luscombe C, Fischer WB. Ligand-protein docking studies of potential HIV-1 drug compounds using the algorithm FlexX. *Anal Bioanal Chem*. 2010; 396: 3559–3563.
  21. Idowu TO, Ogundaini AO, Salau AO, Obuotor EM, Bezabih M, Abegaz BM. Doubly linked, A-type proanthocyanidin trimer and other constituents of *Ixora coccinea* leaves and their antioxidant and antibacterial properties. *Phytochemistry*. 2010; 71: 2092–2098. doi: [10.1016/j.phytochem.2010.08.018](https://doi.org/10.1016/j.phytochem.2010.08.018) PMID: [20843529](https://pubmed.ncbi.nlm.nih.gov/20843529/)
  22. Katerere DR, Gray AI, Nash RJ, Waigh RD. Phytochemical and antimicrobial investigations of stilbenoids and flavonoids isolated from three species of Combretaceae. *Filoterapia*. 2012; 83: 932–940.
  23. Bringmann G, Mutanyatta-Comar J, Knauer M, Abegaz BM. Knipholone and related 4-phenylanthraquinones: structurally, pharmacologically, and biosynthetically remarkable natural products. *Nat Prod Rep*. 2008; 25: 696–718. doi: [10.1039/b803784c](https://doi.org/10.1039/b803784c) PMID: [18663391](https://pubmed.ncbi.nlm.nih.gov/18663391/)
  24. Hayeshi R, Mukanganyama S, Hazra B, Abegaz B, Hasler J. The interaction of selected natural products with human recombinant glutathione transferases. *Phytother Res*. 2004; 18: 877–883. PMID: [15597303](https://pubmed.ncbi.nlm.nih.gov/15597303/)
  25. Kuroda M, Mimaki Y, Sakagami H, Sashida Y. Bulbinelonesidea A-E, phenylanthraquinone glycosides from the roots of *Bulbinella floribunda*. *J Nat Prod*. 2003; 66: 894–897. PMID: [12828488](https://pubmed.ncbi.nlm.nih.gov/12828488/)
  26. Brockman MA, Tanzi GO, Walker BD, Allen TM. Use of a novel GFP reporter cell line to examine replication capacity of CXCR4- and CCR5-tropic HIV-1 by flow cytometry. *J Viral Methods*. 2006; 131: 134–142. PMID: [16182382](https://pubmed.ncbi.nlm.nih.gov/16182382/)
  27. Lindenbach BD, Evans MJ, Syder AJ, Wölk B, Tellinghuisen TL, Liu CC, et al. Complete replication of hepatitis C virus in cell culture. *Science*. 2005; 309: 623–626. PMID: [15947137](https://pubmed.ncbi.nlm.nih.gov/15947137/)
  28. Ewart GD, Luscombe CA, Miller M. Hepatitis C antiviral compositions and methods. 1996; WO 2009/18609 A1.
  29. Gibbs JS, Regier DA, Desrosiers RC. Construction and *in vitro* properties of HIV-1 mutants with deletions in “nonessential” genes. *AIDS Res Hum Retroviruses*. 1994; 10: 343–350. PMID: [8068414](https://pubmed.ncbi.nlm.nih.gov/8068414/)
  30. Halgren TA. Merck molecular forcefield. *J Comput Chem*. 1996; 17: 490–641.

31. Chemical Computing Group Inc: *Molecular Operating Environment Software*. Montreal; 2010.
32. Daveu C, Bureau R, Baglin I, Prunier H, Lancelot JC, Rault S. Definition of a pharmacophore for partial agonists of serotonin 5-HT<sub>3</sub> receptors. *J Chem Info Comput Sci*. 1999; 39: 362–369. PMID: [10192948](#)
33. Mwimanzi P, Markle TJ, Martin E, Ogata Y, Kuang XT, Tokunaga M, et al. Attenuation of multiple Nef functions in HIV-1 elite controllers. *Retrovirology*. 2013; 10: 1. doi: [10.1186/1742-4690-10-1](#) PMID: [23289738](#)
34. Brumme ZL, Li C, Miura T, Sela J, Rosato PC, Brumme CJ, et al. Reduced replication capacity of NL4-3 recombinant viruses encoding reverse transcriptase-integrase sequences from HIV-1 elite controllers. *J Acquir Immune Defic Syndr*. 2011; 56: 100–108. doi: [10.1097/QAI.0b013e3181fe9450](#) PMID: [21124229](#)
35. Gottwein JM, Scheel TK, Jensen TB, Lademann JB, Prentoe JC, Knudsen ML, et al. Development and characterization of hepatitis C virus genotype 1–7 cell culture systems: role of CD81 and scavenger receptor class B type I and effect of antiviral drugs. *Hepatology*. 2009; 49: 364–377. doi: [10.1002/hep.22673](#) PMID: [19148942](#)
36. Kuhl BD, Cheng V, Donahue DA, Sloan RD, Liang C, Wilkinson J, et al. The HIV-1 Vpu viroporin inhibitor BIT225 does not affect Vpu-mediated tetherin antagonism. *PLOS ONE*. 2011; 6: e27660. doi: [10.1371/journal.pone.0027660](#) PMID: [22110710](#)
37. Moradpour D, Penin F. Hepatitis C virus proteins: From structure to function. *Curr Top Microbiol Immunol*. 2013; 369: 113–142. doi: [10.1007/978-3-642-27340-7\\_5](#) PMID: [23463199](#)
38. Griffin S, StGelais C, Owsianka AM, Patel AH, Rowlands D, Harris M. Genotype-dependent sensitivity of hepatitis C virus to inhibitors of the p7 ion channel. *Hepatology*. 2008; 48: 1779–1790. doi: [10.1002/hep.22555](#) PMID: [18828153](#)
39. Luscombe CA, Huang Z, Murray MG, Miller M, Wilkinson J, Ewart GD. A novel hepatitis C virus p7 ion channel inhibitor, BIT225, inhibits bovine viral diarrhea virus in vitro and shows synergism with recombinant interferon- $\alpha$ -2b and nucleoside analogues. *Antivir Res*. 2010; 86: 144–153. doi: [10.1016/j.antiviral.2010.02.312](#) PMID: [20156486](#)
40. Meredith LW, Zitzmann N, McKeating JA. Differential effect of p7 inhibitors on hepatitis C virus cell-to-cell transmission. *Antivir Res*. 2013; 100: 636–639. doi: [10.1016/j.antiviral.2013.10.006](#) PMID: [24157306](#)
41. Jiang F, Chen W, Yi K, Wu Z, Si Y, Han W, et al. The evaluation of catechins that contain a galloyl moiety as potential HIV-1 integrase inhibitors. *Clin Immunol*. 2010; 137: 347–356. doi: [10.1016/j.clim.2010.08.007](#) PMID: [20832370](#)
42. Tillekeratne LM, Sherette A, Grossman Hupe L, Hupe D, Hudson RA. Simplified catechin-gallate inhibitors of HIV-1 reverse transcriptase. *Bioorg Med Chem Lett*. 2001; 11: 3763–3767.
43. Zhao Y, Jiang F, Liu P, Chen W, Yi K. Catechins containing a galloyl moiety as potential anti-HIV-1 compounds. *Drug Disc Today*. 2012; 17: 630–635. doi: [10.1016/j.drudis.2012.02.015](#) PMID: [22414543](#)
44. Sauter D, Schwarz S, Wang K, Zhang R, Sun B, Schwarz W. Genistein as antiviral drug against HIV ion channel. *Planta Med*. 2014; 80: 682–687. doi: [10.1055/s-0034-1368583](#) PMID: [24963618](#)
45. O'Brien P, Carrasco-Pozo C, Speisky H. Boldine and its antioxidant or health-promoting properties. *Chem Biol Interact*. 2006; 159: 1–17. PMID: [16221469](#)
46. Lau YS, Ling WC, Murugan D, Mustafa MR. Boldine ameliorates vascular oxidative stress and endothelial dysfunction: Therapeutic implication for hypertension and diabetes. *J Cardiovasc Pharmacol*. 2014; in press. doi: [10.1097/FJC.0185](#)
47. Kashiwada Y, Aoshima A, Ikeshiro Y, Chen YP, Furukawa H, Itoigawa M, et al. Anti-HIV benzyloquinoline alkaloids and flavonoids from the leaves of *Nelumbo nucifera*, and structure-activity correlations with related alkaloids. *Bioorg Med Chem*. 2005; 13: 443–448. PMID: [15598565](#)
48. Boustie J, Stigliani JL, Montanha J, Amoros M, Payard M, Girre L. Antipoliiovirus structure-activity relationships of some aporphine alkaloids. *J Nat Prod*. 1998; 61: 480–484. PMID: [9584402](#)
49. Spasova M, Philipov S, Nikolaeva-Glomb L, Galabov AS, Milkova T. Cinnamoyl- and hydroxycinnamoyl amides of glaucine and their antioxidative and antiviral activities. *Bioorg Med Chem*. 2008; 16: 7457–7461. doi: [10.1016/j.bmc.2008.06.010](#) PMID: [18590964](#)
50. Montanha JA, Amoros M, Boustie J, Girre L. Anti-herpes virus activity of aporphine alkaloids. *Planta Med*. 1995; 61: 419–424. PMID: [7480202](#)
51. Chang SS, Huang HJ, Chen CYC. Two birds with one stone? Possible dual-targeting H1N1 inhibitors from traditional Chinese medicine. *PLOS Comput Biol*. 2011; 7: e1002315. doi: [10.1371/journal.pcbi.1002315](#) PMID: [22215997](#)
52. Schramm A, Saxena P, Chlebek J, Cahlíková L, Baburin I, Hering S, et al. Natural products as potential human ether-a-go-go-related gene channel inhibitors—screening of plant-derived alkaloids. *Planta Med*. 2014; 80: 740–746. doi: [10.1055/s-0034-1368590](#) PMID: [24963621](#)

53. Walstab J, Wohlfarth C, Hovius R, Schmitteckert S, Röth R, Lasitschka F, et al. Natural compounds boldine and menthol are antagonists of human 5-HT<sub>3</sub> receptors: implications for treating gastrointestinal disorders. *Neurogastroenterol Motil*. 2014; 26: 810–820. doi: [10.1111/nmo.12334](https://doi.org/10.1111/nmo.12334) PMID: [24708203](https://pubmed.ncbi.nlm.nih.gov/24708203/)
54. Iturriaga-Vásquez P, Pérez EG, Slater EY, Bermúdez I, Cassels BK. Aporphine metho salts as neuronal nicotinic acetylcholine receptor blockers. *Bioorg Med Chem*. 2007; 15: 3368–3372. PMID: [17391965](https://pubmed.ncbi.nlm.nih.gov/17391965/)
55. Ivorra MD, Chuliá S, Lugnier C, D'Ocon MP. Selective action of two aporphines at  $\alpha_1$ -adrenoceptors and potential-operated Ca<sup>2+</sup> channels. *Eur J Pharmacol*. 1993; 231: 165–174. PMID: [8384112](https://pubmed.ncbi.nlm.nih.gov/8384112/)
56. Aldersley M, Corless L, Griffin S. Hepatitis C, rimantadine, and antiviral combination therapy (HepRiACT). Database: ClinicalTrials.gov. <http://clinicaltrials.gov/show/NCT01413490> NLM. Accessed 22 October 2014.
57. Rockstroh JK, Bhagani S. Managing HIV/hepatitis C co-infection in the era of direct acting antivirals. *BMC Medicine*. 2013; 11: 234. doi: [10.1186/1741-7015-11-234](https://doi.org/10.1186/1741-7015-11-234) PMID: [24228933](https://pubmed.ncbi.nlm.nih.gov/24228933/)
58. Barth ER, Huijgen Q, Taljaard J, Hoepelman AIM. Hepatitis B/C in sub-Saharan Africa: an association between highly prevalent infectious diseases. A systematic review and meta-analysis. *Int J Infect Dis*. 2010; 14: e1024–e1031. doi: [10.1016/j.ijid.2010.06.013](https://doi.org/10.1016/j.ijid.2010.06.013) PMID: [20870439](https://pubmed.ncbi.nlm.nih.gov/20870439/)
59. Liu S, Lu H, Zhao Q, He Y, Niu J, Debnath AK, et al. Theaflavin derivatives in black tea and catechin derivatives in green tea inhibit HIV-1 entry by targeting gp41. *Biochim Biophys Acta*. 2005; 1723: 270–281. PMID: [15823507](https://pubmed.ncbi.nlm.nih.gov/15823507/)
60. Asami Y, Ogura T, Otake N, Nishimura T, Xinsheng Y, Sakurai T, et al. Isolation and synthesis of a new bioactive ellagic acid derivative from *Combretum yunnanensis*. *J Nat Prod*. 2003; 66: 729–731. PMID: [12762821](https://pubmed.ncbi.nlm.nih.gov/12762821/)
61. Farnet CM, Wang B, Hansen M, Lipford JR, Zalkow L, Robinson WE Jr, et al. Human immunodeficiency virus type 1 cDNA integration: New aromatic hydroxylated inhibitors and studies of the inhibition mechanism. *Antimicrob Agents Chemother*. 1998; 42: 2245–2253. PMID: [9736543](https://pubmed.ncbi.nlm.nih.gov/9736543/)
62. Nutan, Modi M, Goel T, Das T, Malik S, Suri S, et al. Ellagic acid and gallic acid from *Lagerstroemia speciosa* L inhibit HIV-1 infection through inhibition of HIV-1 protease and reverse transcriptase activity. *Indian J Med Res*. 2013; 137: 540–548. PMID: [23640562](https://pubmed.ncbi.nlm.nih.gov/23640562/)
